# Supplementary material for: Diagnostic performance of microRNAs in testicular germ cell tumors: a systematic review and meta-analysis
Source: publisher site journal article supplement (doi:10.18632/aging.203376), 2021-08-03
Supplement: Supplementary file [file aging-v13i15-203376-supplementary-material-SD1.pdf]

SUPPLEMENTARY FIGURES

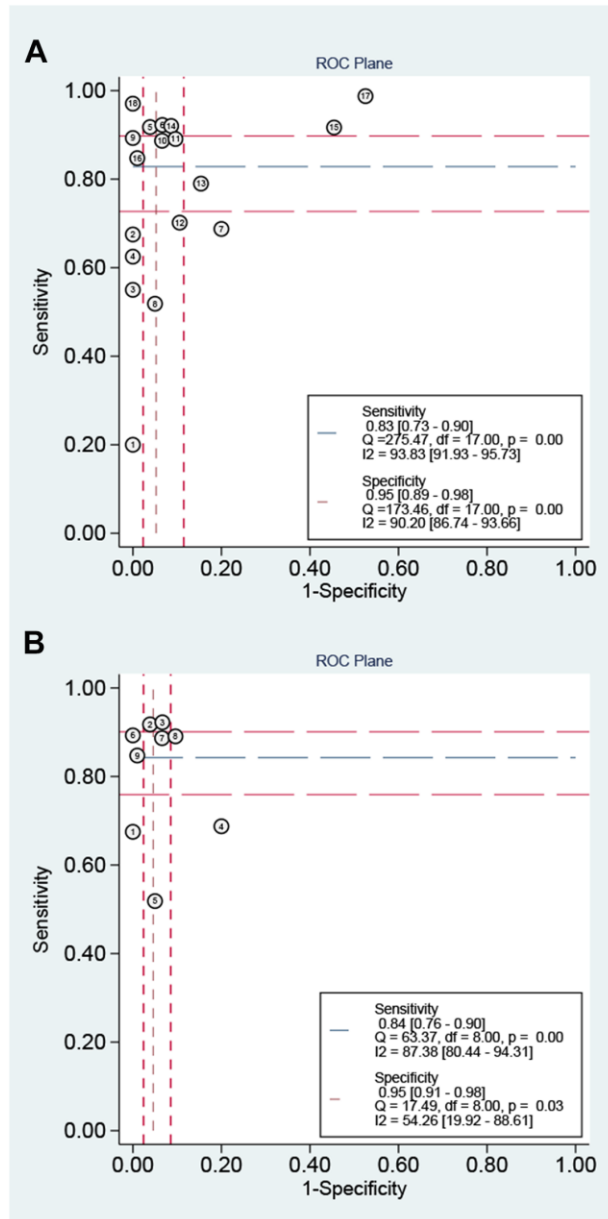

Supplementary Figure 1. ROC plane of the included studies. (A) ROC plane of total microRNAs; (B) ROC plane of single miR-371-3p.

### Sensitivity analysis of sensitivity

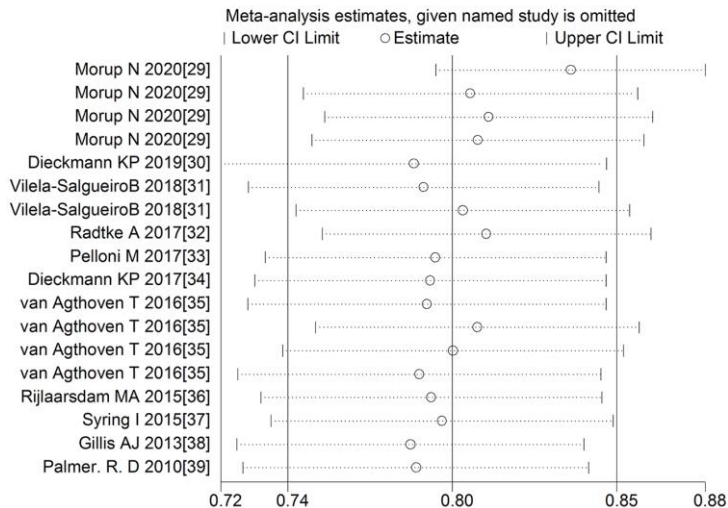

### Sensitivity analysis of specificity

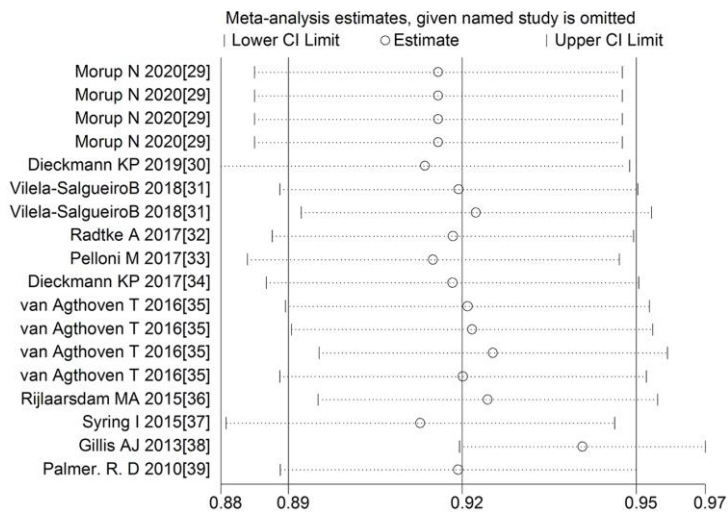

Supplementary Figure 2. Sensitivity analysis of the included studies.

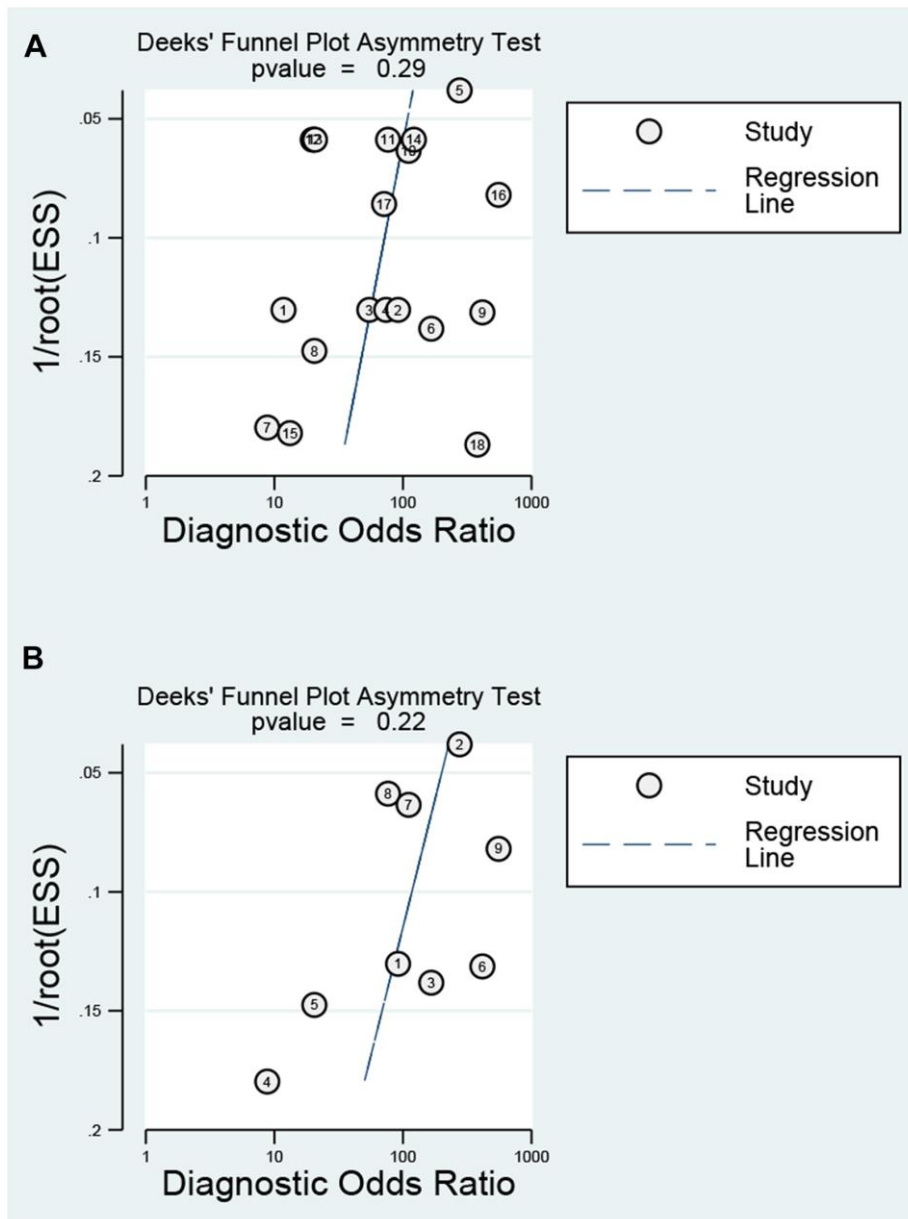

**Supplementary Figure 3. Estimation of the publication bias by Deeks' funnel plots.** (A) Deeks' funnel plots of total microRNAs ( $P = 0.29$ ); (B) Deeks' funnel plots of single miR-371a-3p ( $P = 0.22$ ).

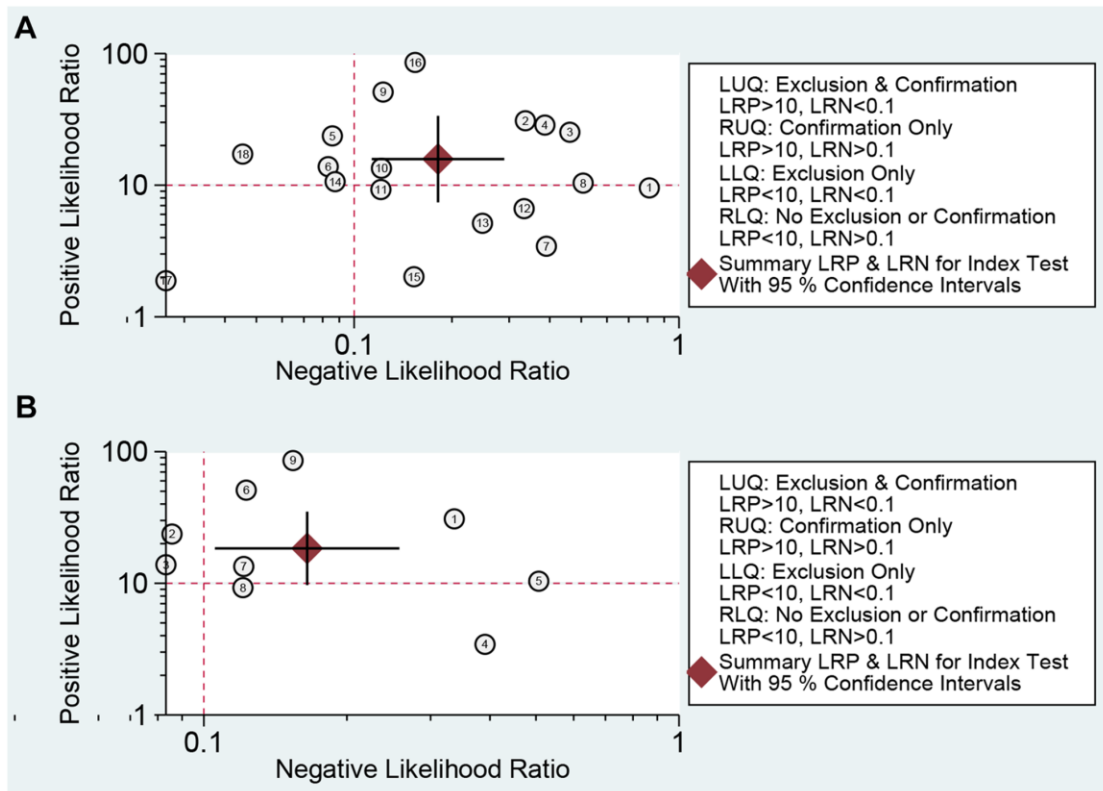

**Supplementary Figure 4. Likelihood ratio scattergram.** (A) Likelihood ratio scattergram of total microRNAs; (B) Likelihood ratio scattergram of single miR-371a-3p. Abbreviations: LRP: positive likelihood ratio; LRN: negative likelihood ratio; LUQ: left upper quadrant; RUQ: right upper quadrant; LLQ: left lower quadrant; RLQ: right lower quadrant.

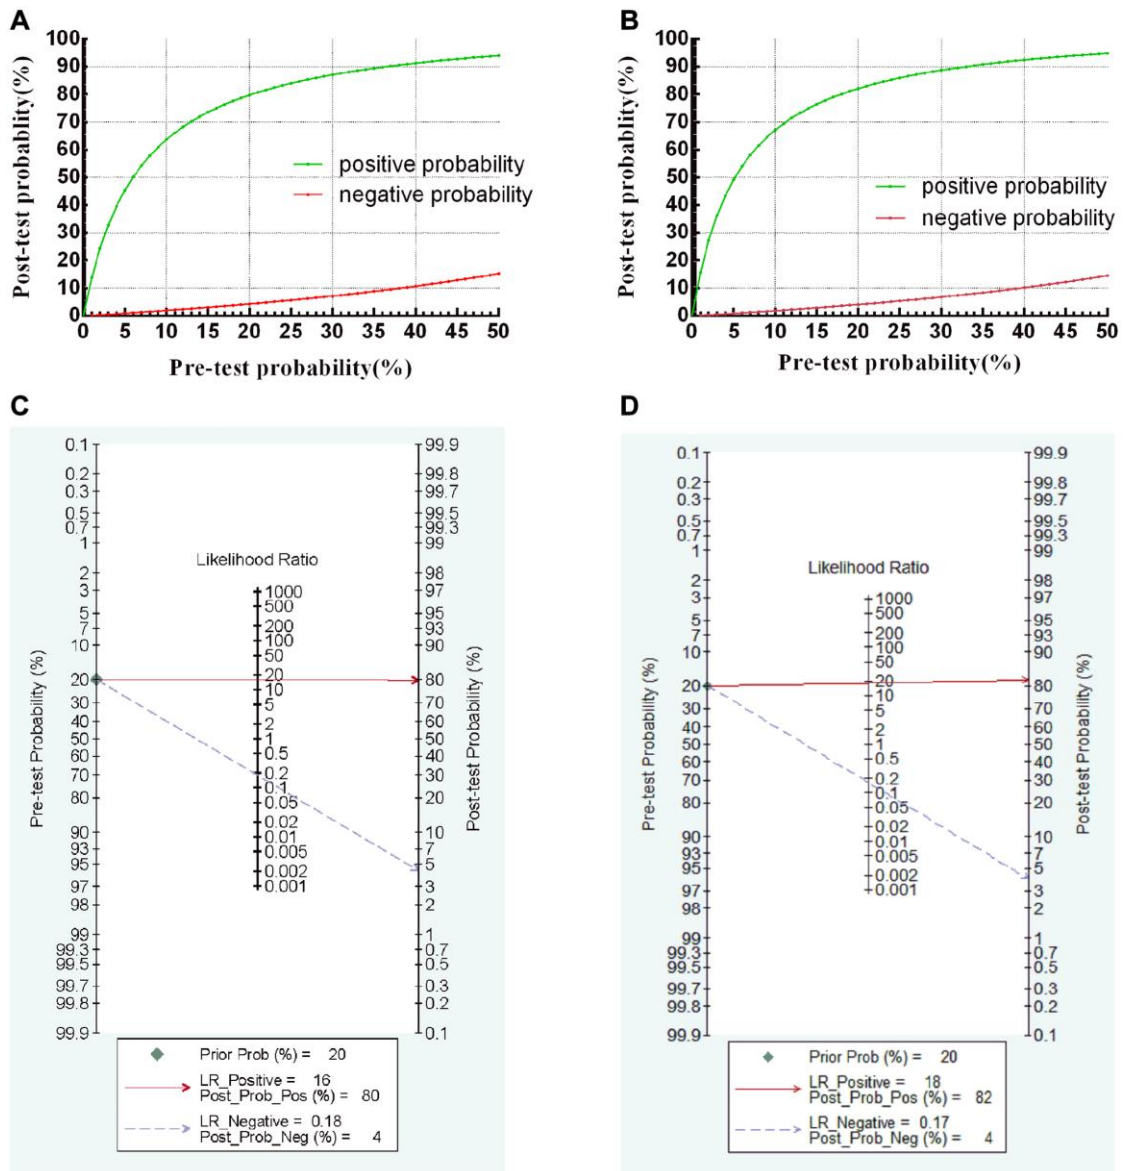

**Supplementary Figure 5. Line charts and Fagan’s plots indicating diagnostic probability.** (A) diagnostic probability line chart of total microRNAs; (B) diagnostic probability line chart of single miR-371a-3p; (C) Fagan’s plot based on the TGCT pre-test probability of 20% for total microRNAs; (D) Fagan’s plot based on the TGCT pre-test probability of 20% for single miR-371a-3p.
